# Supplementary material for: Differences in the Gut Microbiomes of Distinct Ethnicities Within the Same Geographic Area Are Linked to Host Metabolic Health
Source: Research Square preprint supplement (doi:10.21203/rs.3.rs-100084/v1), 2020-11-04
Supplement: Supplementary file 1 [file bdf113bf7acd0dced6db487d.xlsx]

## Sheet: Table S1
Table S1. Characteristics of IDEO study participants
Characteristics	Lean			Obese
	East Asian (n=12)	White (n=11)	adjusted p-value	East Asian (n=10)	White (n=13)	adjusted p-value
Demographic Features
Age, years	47.1 ± 12.2	40.8 ± 14.8	0.636	43.8 ± 12.4	50.0 ± 12.2	0.636923
Sex, n (%)
Women	8 (66.7%)	7 (63.6%)	1	5 (50.0%)	8 (61.5%)	1
Men	4 (33.3%)	4 (36.4%)		5 (50.0%)	5 (38.5%)
US born, n (%)	6 (50.0%)	6 (54.5%)	1	6 (60.0%)	12 (92.3%)	0.636923
Metabolic Parameters
Diabetes, n (%)	2 (16.7%)	0 (0%)	0.69697	2 (20.0%)	5 (38.5%)	0.838824
BMI, kg/m2	22.3 ± 1.94 ⧫	21.7 ± 2.08 ⬹	0.69697	33.0 ± 6.59 ⧫	40.1 ± 6.44 ⬹	0.291333
Weight, kg	58.7 ± 10.1 ⧫	63.6 ± 11.7 ⬹	0.636923	89.8 ± 22.8 ⧫	111 ± 20.7 ⬹	0.3565
Body fat, %	32.2 ± 6.21	29.8 ± 6.18 ⬹	0.636923	37.9 ± 6.35	43.5 ± 5.16 ⬹	0.3772
WHR	0.889 ± 0.0651	0.836 ± 0.0727 ⬹	0.613333	0.876 ± 0.333	0.998 ± 0.0976 ⬹	0.636923
Fat Mass, g	18700 ± 3590 ⧫	18700 ± 4340 ⬹	1	33900 ± 12200 ⧫	47500 ± 10800 ⬹	0.291333
Fat Free Mass, g	38000 ± 9360 ⧫	42300 ± 10100 ⬹	0.636923	52200 ± 11600 ⧫	58900 ± 11600 ⬹	0.636923
VAT mass, g	301 ± 168 ⧫	235 ± 101 ⬹	0.636923	713 ± 339 ⧫	899 ± 376 ⬹	0.636923
%VAT/Fat Mass	1.58 ± 0.738	1.32 ± 0.635	0.647407	2.10 ± 0.681	1.89 ± 0.705	0.69697
Laboratory Parameters
Insulin, mIU/L	7.35 ± 2.77 ⧫	5.45 ± 2.86 ⬹	0.613333	23.8 ± 17.0 ⧫	23.5 ± 14.4 ⬹	1
FPG, mg/dL	101 ± 24.9	89.7 ± 6.86	0.636923	127 ± 53.4	117 ± 72.4	0.894444
HOMA-IR	1.92 ± 0.996	1.27 ± 0.647 ⬹	0.605667	8.80 ± 9.64	8.15 ± 8.92 ⬹	1
Cholesterol, mg/dL	194 ± 24.9	181 ± 29.1	0.636923	206 ± 60.1	180 ± 63.9	0.636923
Triglycerides, mg/dL	106 ± 55.2	58.4 ± 29.5 ⬹	0.291333	183 ± 233	127 ± 57.5 ⬹	0.69697
LDL, mg/dL	114 ± 27.2	109 ± 30.5	0.894444	120 ± 44.0	120 ± 41.6	1
HDL, mg/dL	58.6 ± 16.2	58.3 ± 12.8 ⬹	1	50.9 ± 11.6	45.9 ± 10.2 ⬹	0.636923
Lifestyle Parameters
Alcohol, drinks per week	4.47 ± 7.69	1.92 ± 2.47	0.636923	2.05 ± 5.20	2.82 ± 5.06	0.907568
Statin use, n (%)	1 (8.3%)	0 (0%) ⬹	1	2 (20.0%)	8 (61.5%) ⬹	0.613333
Metformin use, n (%)	2 (16.7%)	0 (0%)	0.69697	1 (10.0%)	4 (30.8%)	0.69697
Physical activity, MET-min/week	3570 ± 3480	4680 ± 1570 ⬹	0.636923	3070 ± 1870	2000 ± 1760 ⬹	0.636923
Values are mean ± SD. Abbreviations: BMI, body mass index; WHR, waist-hip-ratio; VAT, visceral adipose tissue; FPG, fasting plasma glucose; HOMA-IR, homeostatic model assessment of insulin resistance. HOMA-IR = fasting insulin (mIU/L) × [FPG (mg/dL)/405]. Where indicated, n (%) values are indicated by n and and the percentage of each group within parentheses. The adjusted p-values are the Benjami…

## Sheet: Table S2
Table S2. Human 16S-Seq and metagenomic sequencing sample information
Sample ID	16S raw reads	16S filtered reads	MG raw reads	MG filtered reads	MG raw bp	MG filtered bp	Metabolomics	Ethnicity	BMI classification	BMI (kg/m2)	Body fat (%)	US born	Zipcode	Birth location	2018 Census White population*	2018 Census Asian population*
OB012	250093	6008	538458	537358	75384120	74898421	N	East Asian	Obese	34.1	40.9	Yes	94103	San Francisco, CA	11546	8890
OB021	187355	4465	37141548	36970010	5199817000	5172140000	N	East Asian	Obese	36.5	31.3	No	94103	Caston, China	11546	8890
OB022	176014	4287	807172	800958	113004080	112072491	N	East Asian	Obese	26.8	41.7	No	94080	Hong Kong, China	23613	26918
OB024	239223	5656	39418556	39227226	5518598000	5487086000	Y	East Asian	Obese	32.8	35.7	No	94110	Zhejiang, China	41050	10839
OB026	302603	7207	33361092	32551078	4670553000	4551964000	N	East Asian	Lean	22.4	26.7	No	94112	China	19903	43725
OB027	299934	6814	16910822	16817886	2367515000	2352743000	N	East Asian	Lean	20.1	36	No	94112	Chengdu, China	19903	43725
OB030	265873	6203	53680268	53392530	7515238000	7470358000	N	East Asian	Lean	24.5	23.8	Yes	94040	Phoenix, AZ	17830	12975
OB035	172407	4070	16040300	15955080	2245642000	2231664000	Y	East Asian	Lean	19.8	29.5	Yes	94552	San Francisco, CA	6098	6387
OB040	309015	7313	76758090	76328248	10746133000	10677475000	Y	East Asian	Lean	21.8	36	Yes	94116	San Francisco, CA	17256	25298
OB041	383100	8934	49509522	49363628	6931333000	6907150000	N	East Asian	Lean	23.4	41.1	No	94566	Tian Jian, China	29487	11912
OB043	344064	8359	33200258	32994820	4648036000	4616204000	Y	East Asian	Obese	40.3	47.1	No	94015	Taiwan	14995	38661
OB044	172876	4197	36383272	36193792	5093658000	5064008000	N	East Asian	Lean	24.4	29.9	No	NA	Hong Kong, China	NA	NA
OB051	182622	4236	33063370	32888328	4628872000	4601028000	Y	East Asian	Lean	19.7	35.4	No	94547	Hong Kong, China	6984	11804
OB055	289190	6615	31810772	31615190	4453508000	4423220000	N	East Asian	Obese	28.3	32.9	Yes	94619	Flushing, NY	9606	4727
OB057	332295	7748	40514692	40252700	5672057000	5631629000	N	East Asian	Lean	20.2	40.2	No	94920	Canada	11256	512
OB070	268324	6509	38059268	37794720	5328298000	5288004000	Y	East Asian	Lean	22.2	33.4	Yes	94131	Chicago, IL	19393	5564
OB072	295082	7296	35951754	35731164	5033246000	4998850000	N	East Asian	Obese	26.8	39.6	Yes	94116	San Francisco, CA	17256	25298
OB078	311085	7376	29811346	29691224	4173588000	4152946000	N	East Asian	Lean	24.4	33.7	Yes	94122	Santa Clara, CA	24897	28844
OB079	352732	8272	29598156	29502596	4143742000	4126613000	Y	East Asian	Obese	29	28.7	Yes	94127	Columbus, OH	11736	7024
OB084	308967	7344	54764960	54384492	7667094000	7608852000	Y	East Asian	Lean	24.3	21	Yes	94401	San Francisco, CA	18205	6720
OB085	223845	5270	31131262	30930166	4358377000	4327585000	Y	East Asian	Obese	28.7	34.5	Yes	94109	San Francisco, CA	33808	15208
OB088	321958	7663	NA	NA	NA	NA	Y	East Asian	Obese	46.8	47	Yes	NA	San Francisco, CA	NA	NA
OB006	247281	6206	15824940	15731718	2215492000	2201220000	N	White	Obese	30.2	34.8	No	94133	Italy	11340	13327
OB008	80805	1953	56786974	56450806	7950176000	7897490000	N	White	Obese	41.3	46	Yes	94586	Sacramento, CA	760	75
OB011	241862	5731	26755564	26524944	3745779000	3710107000	N	White	Obese	39.9	NA	Yes	94122	Chicago, CA	24897	28844
OB014	241795	5705	30303610	30109364	4242505000	4211653000	N	White	Obese	48.5	39.6	Yes	94806	Reno, Nevada	28120	11499
OB018	302946	6905	39391098	39171394	5514754000	5480016000	Y	White	Obese	50.7	49	Yes	94110	Neptune, NJ	41050	10839
OB020	280088	6551	46432214	46079090	6500510000	6447086000	N	White	Lean	19.2	18.7	Yes	94172	San Francisco, CA	NA	NA
OB028	263878	5701	6389842	6358888	894577880	889537791	N	White	Obese	47.1	45.9	Yes	95401	Marietta, GA	26945	1700
OB036	117145	2824	33110946	32939708	4635532000	4608038000	N	White	Obese	37.4	45.3	Yes	94117	Lawrence, MA	32791	5135
OB039	240217	5456	32872432	32703916	4602140000	4575180000	Y	White	Obese	35	50.2	Yes	94103	Exeter, NH	11546	8890
OB042	349316	8475	41242260	41020170	5773916000	5738257000	N	White	Lean	25.2	28.8	Yes	94030	New York City, NY	9297	10883
OB045	203017	4679	48960506	48770366	6854471000	6822684000	N	White	Lean	22.6	39.6	No	94132	Chernovtski, Ukraine	11157	13033
OB046	182435	4157	8043476	8005192	1126087000	1119832000	Y	White	Obese	30.1	42.3	Yes	94115	San Francisco, CA	20060	7772
OB050	218023	5420	53575362	53310600	7500551000	7458279000	N	White	Obese	36.8	36.9	Yes	94124	NA	4370	12799
OB056	206715	5012	12053782	11972462	1687529000	1675151000	N	White	Obese	43	48.1	Yes	95687	NA	43045	5198
OB059	252967	6008	17046422	17010176	2386499000	2380061000	Y	White	Lean	20.4	33.7	Yes	94117	San Francisco, CA	32791	5135
OB063	328168	7951	32448128	32323324	4542738000	4521738000	Y	White	Lean	24.3	28.4	No	94120	Bailen, Spain	NA	NA
OB064	289890	7118	43900832	43622288	6146116000	6102879000	Y	White	Lean	20.5	26.3	Yes	94122	Mount Vernon, WA	24897	28844
OB066	322885	7641	49012952	48729822	6861813000	6816663000	N	White	Lean	19.2	29.9	No	94112	Italy	19903	43725
OB067	260720	6358	36430094	36319222	5100213000	5080501000	Y	White	Obese	37.8	37.3	Yes	94015	Sacramento, CA	14995	38661
OB068	373322	8732	23572248	23430564	3300115000	3278289000	N	White	Lean	20.6	30.8	No	94122	Hong Kong, China	24897	28844
OB069	312812	7540	38740554	38525848	5423678000	5389440000	Y	White	Lean	20.7	22.1	No	94114	Lille, France	26387	4586
OB071	355699	8482	12775886	12704140	1788624000	1777045000	Y	White	Obese	42.9	46.2	Yes	94619	Venice, CA	9606	4727
OB081	134022	3234	21809094	21684518	3053273000	3033423000	Y	White	Lean	24.1	31.1	Yes	94941	Telford, PA	27172	2083
OB082	295228	6994	44377302	44092470	6212822000	6168605000	N	White	Lean	21.8	38.2	Yes	94110	New York, USA	41050	10839
Abbreviations: MG, metagenomic; BMI, body mass index. NA, not applicable. *Census data was obtained from the B02001 table of 2018 Census data taken from census.gov and included to ease reproduction. Two subjects provided postal codes for a specific location for their mailing address (e.g. not their exact area of residence) and these were not included in the census analysis.

## Sheet: Table S3
Table S3. 16S-Seq sample information for gnotobiotic experiments
Experiment	Mouse ID	16S raw reads	16S filtered reads	Sequencing ID	Index1	Index2	Sample type	Donor ID	Recipient cage	Days from colonization	Collection date	Diet	Donor ethnicity	Mouse sex
LFPP1	NA	19291	16157	IDEO1_donor_OB051	ATTACTCG	ATAGAGGC	Input slurry	OB051	NA	0	2017-09-01	NA	East Asian	NA
LFPP1	NA	38343	29662	IDEO1_donor_OB064	ATTACTCG	TATAGCCT	Input slurry	OB064	NA	0	2017-09-01	NA	White	NA
LFPP1	M1	50510	43199	IDEO1_M1-1	ATTACTCG	CCTATCCT	Stool	OB064	M1	41	2017-10-12	LFPP	White	Male
LFPP1	M2	51050	43133	IDEO1_M1-2	ATTACTCG	GGCTCTGA	Stool	OB064	M1	41	2017-10-12	LFPP	White	Male
LFPP1	M3	50988	42272	IDEO1_M1-3	ATTACTCG	AGGCGAAG	Stool	OB064	M1	41	2017-10-12	LFPP	White	Male
LFPP1	M4	56585	45567	IDEO1_M2-4	ATTACTCG	TAATCTTA	Stool	OB064	M2	41	2017-10-12	LFPP	White	Male
LFPP1	M5	43394	35748	IDEO1_M2-5	ATTACTCG	AAGGAGTA	Stool	OB064	M2	41	2017-10-12	LFPP	White	Male
LFPP1	M6	26462	22187	IDEO1_M2-6	ATTACTCG	GTACTGAC	Stool	OB064	M2	41	2017-10-12	LFPP	White	Male
LFPP1	M7	41440	34174	IDEO1_O1-1	TCCGGAGA	TATAGCCT	Stool	OB051	O1	41	2017-10-12	LFPP	East Asian	Male
LFPP1	M8	27071	22134	IDEO1_O1-2	TCCGGAGA	ATAGAGGC	Stool	OB051	O1	41	2017-10-12	LFPP	East Asian	Male
LFPP1	M9	46142	40042	IDEO1_O1-3	TCCGGAGA	CCTATCCT	Stool	OB051	O1	41	2017-10-12	LFPP	East Asian	Male
LFPP1	M10	42405	36544	IDEO1_O2-4	TCCGGAGA	GGCTCTGA	Stool	OB051	O2	41	2017-10-12	LFPP	East Asian	Male
LFPP1	M11	38802	33173	IDEO1_O2-5	TCCGGAGA	AGGCGAAG	Stool	OB051	O2	41	2017-10-12	LFPP	East Asian	Male
LFPP1	M12	53870	45169	IDEO1_O2-6	TCCGGAGA	TAATCTTA	Stool	OB051	O2	41	2017-10-12	LFPP	East Asian	Male
LFPP2	M13	30952	24805	IDEO2_7_1	CGCTCATT	TATAGCCT	Stool	OB069	7A	21	2018-08-01	LFPP	White	Male
LFPP2	M14	15139	13009	IDEO2_7_2	CGCTCATT	ATAGAGGC	Stool	OB069	7A	21	2018-08-01	LFPP	White	Male
LFPP2	M15	46482	39738	IDEO2_7_3	CGCTCATT	CCTATCCT	Stool	OB069	7B	21	2018-08-01	LFPP	White	Male
LFPP2	M16	37922	32121	IDEO2_7_4	CGCTCATT	GGCTCTGA	Stool	OB069	7B	21	2018-08-01	LFPP	White	Male
LFPP2	M17	47024	39591	IDEO2_7_5	CGCTCATT	AGGCGAAG	Stool	OB069	7C	21	2018-08-01	LFPP	White	Male
LFPP2	M18	54040	43908	IDEO2_7_6	CGCTCATT	TAATCTTA	Stool	OB069	7C	21	2018-08-01	LFPP	White	Male
LFPP2	M19	48758	41043	IDEO2_8_1	CGCTCATT	AAGGAGTA	Stool	OB084	8A	21	2018-08-01	LFPP	East Asian	Male
LFPP2	M20	42280	35860	IDEO2_8_2	CGCTCATT	GTACTGAC	Stool	OB084	8A	21	2018-08-01	LFPP	East Asian	Male
LFPP2	M21	51863	44531	IDEO2_8_3	GAGATTCC	TATAGCCT	Stool	OB084	8B	21	2018-08-01	LFPP	East Asian	Male
LFPP2	M22	44001	38507	IDEO2_8_4	GAGATTCC	ATAGAGGC	Stool	OB084	8B	21	2018-08-01	LFPP	East Asian	Male
LFPP2	M23	50970	44886	IDEO2_8_5	GAGATTCC	CCTATCCT	Stool	OB084	8C	21	2018-08-01	LFPP	East Asian	Male
LFPP2	M24	65412	58549	IDEO2_8_6	GAGATTCC	GGCTCTGA	Stool	OB084	8C	21	2018-08-01	LFPP	East Asian	Male
LFPP2	NA	15916	11688	IDEO2_donor_OB069	TCCGGAGA	AAGGAGTA	Input slurry	OB069	NA	0	2018-07-10	NA	White	NA
LFPP2	NA	23291	19368	IDEO2_donor_OB084	TCCGGAGA	GTACTGAC	Input slurry	OB084	NA	0	2018-07-10	NA	East Asian	NA
HFHS	NA	39936	31488	IDEO4_donor_B	GAGATTCC	TAATCTTA	Input slurry	OB051	NA	0	2019-07-22	NA	East Asian	NA
HFHS	NA	48552	37827	IDEO4_donor_A	GAGATTCC	AGGCGAAG	Input slurry	OB064	NA	0	2019-07-22	NA	White	NA
HFHS	NA	41624	33277	IDEO4_donor_C	GAGATTCC	AAGGAGTA	Input slurry	OB069	NA	0	2019-07-22	NA	White	NA
HFHS	NA	34856	28763	IDEO4_donor_D	GAGATTCC	GTACTGAC	Input slurry	OB084	NA	0	2019-07-22	NA	East Asian	NA
HFHS	NA	23746	19204	IDEO4_donor_F	ATTCAGAA	ATAGAGGC	Input slurry	OB026	NA	0	2019-08-16	NA	East Asian	NA
HFHS	NA	40776	31169	IDEO4_donor_G	ATTCAGAA	CCTATCCT	Input slurry	OB045	NA	0	2019-08-16	NA	White	NA
HFHS	NA	48595	38988	IDEO4_donor_E	ATTCAGAA	TATAGCCT	Input slurry	OB063	NA	0	2019-08-16	NA	White	NA
HFHS	NA	42426	33713	IDEO4_donor_H	ATTCAGAA	GGCTCTGA	Input slurry	OB070	NA	0	2019-08-16	NA	East Asian	NA
HFHS	NA	44005	33245	IDEO4_donor_K	ATTCAGAA	AAGGAGTA	Input slurry	OB051	NA	0	2019-08-26	NA	East Asian	NA
HFHS	NA	53451	40414	IDEO4_donor_J	ATTCAGAA	TAATCTTA	Input slurry	OB078	NA	0	2019-08-26	NA	East Asian	NA
HFHS	NA	45100	35981	IDEO4_donor_I	ATTCAGAA	AGGCGAAG	Input slurry	OB081	NA	0	2019-08-26	NA	White	NA
HFHS	M40	35197	27878	IDEO4_I_1	CTGAAGCT	AAGGAGTA	Stool	OB081	I	17	2019-09-12	HFHS	White	Male
HFHS	M41	34687	28078	IDEO4_I_2	CTGAAGCT	GTACTGAC	Stool	OB081	I	17	2019-09-12	HFHS	White	Male
HFHS	M42	30987	24097	IDEO4_J_3	TAATGCGC	TATAGCCT	Stool	OB078	J	17	2019-09-12	HFHS	East Asian	Male
HFHS	M43	17683	14250	IDEO4_J_4	TAATGCGC	ATAGAGGC	Stool	OB078	J	17	2019-09-12	HFHS	East Asian	Male
HFHS	M44	39384	30630	IDEO4_K_5	TAATGCGC	CCTATCCT	Stool	OB051	K	17	2019-09-12	HFHS	East Asian	Male
HFHS	M25	28813	22696	IDEO4_A_1	ATTCAGAA	GTACTGAC	Stool	OB064	A	21	2019-08-12	HFHS	White	Male
HFHS	M26	34233	27171	IDEO4_A_2	GAATTCGT	TATAGCCT	Stool	OB064	A	21	2019-08-12	HFHS	White	Male
HFHS	M27	26349	21797	IDEO4_B_3	GAATTCGT	ATAGAGGC	Stool	OB051	B	21	2019-08-12	HFHS	East Asian	Male
HFHS	M28	47253	38493	IDEO4_C_5	GAATTCGT	CCTATCCT	Stool	OB069	C	21	2019-08-12	HFHS	White	Male
HFHS	M29	33842	26744	IDEO4_C_6	GAATTCGT	GGCTCTGA	Stool	OB069	C	21	2019-08-12	HFHS	White	Male
HFHS	M30	41127	33590	IDEO4_C_7	GAATTCGT	AGGCGAAG	Stool	OB084	D	21	2019-08-12	HFHS	East Asian	Male
HFHS	M31	47254	37768	IDEO4_C_8	GAATTCGT	TAATCTTA	Stool	OB084	D	21	2019-08-12	HFHS	East Asian	Male
HFHS	M32	43063	36285	IDEO4_E_1	GAATTCGT	AAGGAGTA	Stool	OB063	E	21	2019-09-06	HFHS	White	Male
HFHS	M33	32974	27444	IDEO4_E_2	GAATTCGT	GTACTGAC	Stool	OB063	E	21	2019-09-06	HFHS	White	Male
HFHS	M34	36548	30184	IDEO4_F_3	CTGAAGCT	TATAGCCT	Stool	OB026	F	21	2019-09-06	HFHS	East Asian	Male
HFHS	M35	9107	6880	IDEO4_F_4	CTGAAGCT	ATAGAGGC	Stool	OB026	F	21	2019-09-06	HFHS	East Asian	Male
HFHS	M36	41779	34330	IDEO4_G_5	CTGAAGCT	CCTATCCT	Stool	OB045	G	21	2019-09-06	HFHS	White	Male
HFHS	M37	51985	44288	IDEO4_G_6	CTGAAGCT	GGCTCTGA	Stool	OB045	G	21	2019-09-06	HFHS	White	Male
HFHS	M38	56558	46457	IDEO4_H_7	CTGAAGCT	AGGCGAAG	Stool	OB070	H	21	2019-09-06	HFHS	East Asian	Male
HFHS	M39	62264	48814	IDEO4_H_8	CTGAAGCT	TAATCTTA	Stool	OB070	H	21	2019-09-06	HFHS	East Asian	Male
Abbreviations: NA, not applicable. LFPP, low-fat high-plant-polysaccharide. HFHS, high-fat high-sugar.

## Sheet: Table_S4
Table S4. Features of human donors used for gnotobiotic experiments
LFPP1 Exp (Figs. 5,6)	East Asian (n=1)	White (n=1)		HFHS Exp (Figs. 5,6)	East Asian (n=5)	White (n=5)	p-value		LFPP2 Exp (Fig. S7)	East Asian (n=1)	White (n=1)
Age, years
Value	52	30		Mean ± SD	36.4 ± 9.91	32.6 ± 2.70	0.45		Value	27	32
Sex, n (%)
Female	1 (100%)	1 (100%)		Female	3 (60.0%)	3 (60.0%)	1		Female	0 (0%)	0 (0%)
Male	0 (0%)	0 (0%)		Male	2 (40.0%)	2 (40.0%)			Male	1 (100%)	1 (100%)
Diabetes, n (%)
Y	0 (0%)	0 (0%)		Y	0 (0%)	0 (0%)	NA		Y	0 (0%)	0 (0%)
N	1 (100%)	1 (100%)		N	5 (100%)	5 (100%)			N	1 (100%)	1 (100%)
BMI, kg/m2
Value	19.7	20.5		Mean ± SD	22.6 ± 1.92	22.4 ± 1.80	0.9		Value	24.3	20.7
Fat Mass, g
Value	16000	14600		Mean ± SD	17400 ± 2920	20200 ± 4570	0.3		Value	14000	16800
Free Fat Mass, g
Value	27300	38800		Mean ± SD	39400 ± 8270	47400 ± 11700	0.3		Value	50000	56000
VAT mass, g
Value	122	99		Mean ± SD	204 ± 75.5	230 ± 82.7	0.62		Value	235	305
HOMA-IR
Value	1	1		Mean ± SD	1.60 ± 0.894	1.40 ± 0.894	0.73		Value	1	1
Values for each variable are shown for the individual donors used in the LFPP experiments. Median ± SD (Standard Deviation) or n (%) are shown for each group of 5 donors for the HFHS experiment. Between group p-values are calculated using Student's t test between ethnicities for the HFHS experiment. LFPP1 and HFHS experiments are shown in Figs. 5 and 6, while LFPP2 is shown in Fig. S7. Pearson's …

## Sheet: Table S5
Table S5. Beta diversity metrics comparing East Asian and White subjects
Distance Metric	p-value	R2
Jaccard	0.004	0.034
Bray Curtis	0.004	0.042
Unweighted Unifrac	0.005	0.046
Jensen-Shannon Divergence	0.006	0.048
CLR Euclidean	0.016	0.033
Weighted Unifrac	0.029	0.047
PhILR Euclidean*	0.037	0.037
*PhILR Euclidean is shown in Fig 1A.

## Sheet: Table S6
Table S6. Untargeted metabolomics analyses from the stool samples of East Asian and White individuals
		Short-Chain Fatty Acids			Branched-chain Amino Acids			Other Amino Acids									Sugars		Biological Acids			Base Pairs and Derivatives
Sample ID	Ethnicity	Acetate	Propionate	Butyrate	Valine	Leucine	Isoleucine	Taurine	Lysine	Tyrosine	Glycine	Alanine	Proline	Phenylalanine	Histidine	Tryptophan	Glucose	Oligosaccharides	Lactate	Succinate	Formate	Uracil	Xanthine	Hypoxanthine
OB024	East Asian	0.105872	0.0196361	0.0331871	0.0184559	0.0256636	0.0091392	0.0146849	0.0146373	0.00397359	0.00677823	0.0226964	0.0195367	0.00390062	0.00120891	0.0014127	0.00421156	0.144968	0.0101491	0.00281016	0.00017488	0.00130652	0.00121915	0.00126562
OB035	East Asian	0.0780938	0.0128878	0.0194578	0.01184	0.0263834	0.00892526	0.0102054	0.0210725	0.00413491	0.00818466	0.02485	0.0297065	0.0033708	0.00151696	0.0014111	0.0022647	0.132276	0.0259115	0.00257854	0.00013147	0.00087448	0.00070388	0.00064337
OB040	East Asian	0.0892103	0.0166834	0.0231572	0.0156766	0.028274	0.00925205	0.0127997	0.0114965	0.00396364	0.00710632	0.0244559	0.0263536	0.00350776	0.00127737	0.00151809	0.00295515	0.155562	0.0107455	0.00298491	0.00020301	0.00228319	0.00077399	0.0008476
OB043	East Asian	0.105057	0.0166039	0.038874	0.01537	0.017595	0.00647476	0.00730231	0.00975287	0.00280982	0.0213049	0.0203046	0.0238373	0.00224839	0.00098411	0.00077529	0.00199403	0.135516	0.0216163	0.0021296	0.00024122	0.0037543	0.00082068	0.00097011
OB051	East Asian	0.0729262	0.0115453	0.0214844	0.0105206	0.0322853	0.010741	0.0116258	0.0122118	0.00494251	0.00859401	0.0266358	0.0239737	0.00430093	0.00166441	0.00145685	0.0018973	0.154948	0.0139273	0.00297434	0.00018372	0.00218406	0.00096345	0.00088067
OB070	East Asian	0.135353	0.0109376	0.0443199	0.0101924	0.0234445	0.00856765	0.0163519	0.00994978	0.00368672	0.00797127	0.0219895	0.0184708	0.00317811	0.00126421	0.00109538	0.00466574	0.151384	0.0117393	0.0197077	0.00012832	0.00234883	0.00119967	0.00082532
OB079	East Asian	0.110793	0.0217331	0.0304698	0.0201354	0.0239642	0.008302	0.00695353	0.0116122	0.00433162	0.00616065	0.0239833	0.026948	0.00293451	0.00133167	0.00161879	0.00052445	0.0860736	0.0147892	0.00296643	0.0002717	0.00210912	0.00162652	0.00197197
OB084	East Asian	0.0975805	0.0131943	0.0223202	0.0123452	0.0326622	0.0110375	0.0108086	0.019072	0.00612659	0.00803166	0.0257335	0.0246775	0.00477389	0.00159811	0.00197048	0.00107963	0.117219	0.0124627	0.00272547	0.0002938	0.00502522	0.00097888	0.00102965
OB085	East Asian	0.108561	0.015016	0.0275972	0.0142219	0.0219152	0.00835818	0.0186258	0.0157027	0.00406362	0.00745638	0.0248301	0.0200406	0.00337224	0.00131113	0.001602	0.00629391	0.186946	0.010585	0.00234917	0.00017328	0.00184744	0.00121991	0.00120121
OB088	East Asian	0.106873	0.010836	0.0192059	0.0100476	0.0278659	0.00960807	0.0144212	0.0209931	0.00495173	0.00869468	0.0242499	0.0245378	0.00474629	0.0019348	0.0012566	0.00165235	0.13336	0.0104922	0.00397539	0.00022256	0.00073336	0.00116362	0.0007343
OB018	White	0.0664029	0.00956354	0.0218501	0.00837445	0.0321402	0.0115784	0.00916332	0.0127764	0.00494431	0.0125669	0.0293016	0.0302735	0.00469911	0.00154986	0.00257469	0.00181863	0.153962	0.0145656	0.0276137	0.00026483	0.00201258	0.00207798	0.00211922
OB039	White	0.0605597	0.0105484	0.0180559	0.00940167	0.0319864	0.0117071	0.0163041	0.016307	0.00499596	0.012123	0.0291546	0.0246243	0.00468643	0.00126796	0.0018105	0.00268732	0.18886	0.0125336	0.00321376	0.00023147	0.00087576	0.0010966	0.0007821
OB046	White	0.057417	0.00961548	0.0170016	0.00824372	0.0272263	0.0103785	0.00755087	0.0223634	0.00426671	0.00978354	0.0327765	0.0275471	0.00380498	0.00096963	0.00167494	0.00051691	0.146221	0.0153755	0.00350337	0.00034853	0.00106388	0.00099552	0.00146871
OB059	White	0.0945847	0.0152859	0.0279179	0.0138898	0.0247548	0.00763205	0.00836202	0.0112986	0.00403406	0.0100422	0.0239074	0.0302697	0.00271087	0.00160981	0.00098527	0.00122126	0.107306	0.0184374	0.00249812	0.00032024	0.00341213	0.00132858	0.00149387
OB063	White	0.0833584	0.0123053	0.0207927	0.0108072	0.0263847	0.0104078	0.00830063	0.0145762	0.00462046	0.00866719	0.0282161	0.0318621	0.0038656	0.00171139	0.00164319	0.00074847	0.117535	0.0131696	0.00496294	0.00037714	0.00219051	0.00135889	0.00194633
OB064	White	0.0575562	0.0114883	0.026114	0.0102486	0.03063	0.0118607	0.00649577	0.0116477	0.00454308	0.0110132	0.0293759	0.0278053	0.0043762	0.0011542	0.00190384	0.00115889	0.131529	0.0147078	0.00352516	0.00045268	0.00180028	0.00155285	0.00141285
OB067	White	0.0884279	0.012196	0.0265137	0.0110506	0.0241403	0.00887432	0.00963538	0.0121846	0.00477168	0.00698981	0.0247879	0.0241151	0.00884399	0.00466157	0.0022245	0.00151255	0.11967	0.012056	0.00401362	0.00027036	0.00359088	0.0018743	0.00243464
OB069	White	0.0948249	0.0104105	0.0277021	0.00903534	0.0250512	0.00915629	0.00853734	0.011675	0.00394077	0.00875057	0.0252846	0.029078	0.00322524	0.00129344	0.00161725	0.00120171	0.120261	0.0179372	0.00352791	0.00029514	0.00307301	0.00244334	0.00229379
OB071	White	0.118727	0.0158676	0.041632	0.0148104	0.0255244	0.00922381	0.0125199	0.0118742	0.00411137	0.0074476	0.023623	0.0205093	0.00363973	0.00131982	0.00142472	0.00237264	0.13175	0.0119125	0.00276702	0.00014948	0.0013903	0.00127458	0.00096527
OB081	White	0.071799	0.0104954	0.0368356	0.00927129	0.0224898	0.00762234	0.00750884	0.00936456	0.004106	0.00893531	0.0224135	0.0278773	0.00306393	0.00135731	0.00146514	0.00165373	0.10115	0.0212887	0.00309806	0.00028416	0.00325276	0.00287339	0.001622
East Asian (mean)		0.101032	0.0149073	0.0280073	0.0138806	0.0260053	0.00904057	0.0123779	0.0146501	0.00429848	0.00902828	0.0239729	0.0238082	0.00363335	0.00140917	0.00141173	0.00275388	0.139825	0.0142418	0.00452017	0.000202396	0.00224665	0.00106697	0.00103698
White (mean)		0.0793658	0.0117776	0.0264416	0.0105133	0.0270328	0.00984413	0.00943781	0.0134068	0.00443344	0.00963193	0.0268841	0.0273962	0.00429161	0.0016895	0.0017324	0.00148921	0.131824	0.0151984	0.00587237	0.000299403	0.00226621	0.0016876	0.00165388
Fold-change		1.27299	1.26573	1.05922	1.32029	0.961991	0.918372	1.31152	1.09274	0.969557	0.937328	0.891713	0.869035	0.846618	0.834074	0.814895	1.84922	1.06069	0.93706	0.769736	0.675999	0.99137	0.632243	0.627
Values reflect relative concentrations of identified metabolites obtained by normalized peak area in NMR spectroscopy analysis.

## Sheet: Table S7
Table S7. Targeted metabolomics analyses from the stool samples of East Asian and White individuals
		Short-Chain Fatty Acids (µg/g)					Branched-Chain Amino Acids (µg/g)			Bile Acids (nmol/g)
Sample ID	Ethnicity	Isobutyrate	Acetate	Propionate	Butyrate	Valerate	Leucine	Valine	Isoleucine	Bile acids, total	Bile acids, free	Bile acids, conjugated
OB024	East Asian	273.87	6287.74	760.87	5139.83	559.12	566.3	441.52	318.9	17815.1	17745.1	70.04
OB035	East Asian	253.45	2432.32	270.23	598.25	303.79	360.68	302.94	210.22	4004.12	3992.91	11.21
OB040	East Asian	454.69	2704.3	278.98	1483.71	168.15	455.97	401.54	251.97	15595.6	15501	94.58
OB043	East Asian	106.95	3799.43	378.05	2634.37	703.05	369.74	192.96	137.55	10242.5	10219.7	22.77
OB051	East Asian	275.87	2226.65	219.91	1287.84	389.33	396.61	292.19	155.16	7647.3	7621.16	26.14
OB070	East Asian	-38.55	4400.19	301.69	3705.73	74.63	586.13	492.72	347.42	2929.87	2873.02	56.84
OB079	East Asian	280.31	3592.32	397.25	1836.18	436.24	217.48	192.98	122.54	2486.59	2478.63	7.96
OB084	East Asian	221.2	4311.44	376.77	2073.06	106.69	931.59	782.31	523.25	5398.06	5384.09	13.96
OB085	East Asian	257.41	4014.31	365.28	2294.51	154.09	450.12	457.71	206.6	3910.16	3898.75	11.42
OB088	East Asian	149.75	4444.24	328.99	1383.15	74.08	833.88	800.26	418.78	11462.2	11400.1	62.12
OB018	White	46.68	1809.2	224.59	1103.67	205.04	1396.69	1324.08	895.92	11098.4	11089	9.4
OB039	White	135.4	1479.32	212.25	971.45	240.51	930.53	907.16	614.87	12524.1	12429.6	94.5
OB046	White	68.85	1011.89	151.44	107.98	123.12	164.33	172.77	86.52	9961.64	9949.75	11.89
OB059	White	37.23	1476.12	195.87	902.88	136.54	88.51	85.35	58.59	7904.25	7827	77.25
OB063	White	45.12	1615.99	194.68	449.9	176.22	240.25	279.84	151.06	956.83	950.73	6.11
OB064	White	182.16	1607.51	217.36	1558.69	272.6	291.26	212.41	122.21	3047.27	3026.55	20.72
OB067	White	107.49	2773.64	279.64	1306.34	357.06	272.34	196.69	119.02	9031.99	9002.27	29.73
OB069	White	7.9	2283.88	211.24	1309.68	242.38	210.66	176.52	114.17	3207.47	3199.45	8.02
OB071	White	96.57	4574.29	431.94	4030.3	360.64	684.85	476.4	358.29	4302.2	4201.09	101.1
OB081	White	92.39	2005.45	218.51	2898.26	241.56	154.91	114.25	66.79	9744.81	9699.09	45.71
East Asian (mean)		223.495	3821.29	367.802	2243.66	296.917	516.85	435.713	269.239	8149.16	8111.45	37.704
White (mean)		81.979	2063.73	233.752	1463.91	235.567	443.433	394.547	258.744	7177.9	7137.46	40.443
Fold-change		2.72625	1.85165	1.57347	1.53265	1.26044	1.16557	1.10434	1.04056	1.13531	1.13646	0.932275

## Sheet: Table S8
Table S8. ASA24 data for East Asian and White subjects stratified by BMI classification
Nutrients	Lean			Obese
	East Asian (n=12)	White (n=11)	adjusted p-value	East Asian (n=10)	White (n=13)	adjusted p-value
Energy (kcal)	1690 ± 739	2010 ± 886	0.6525	2450 ± 1260	1440 ± 911	0.232
Protein (g)	72.5 ± 34.7	69.2 ± 32.7	0.94	94.9 ± 47.3	65.4 ± 47.3	0.3625
Fat (g)	69.1 ± 31.8	78.6 ± 45.9	0.787143	106 ± 65.7	61.9 ± 47.0	0.293222
Fatty acids, total saturated (g)	17.5 ± 10.2	19.6 ± 11.1	0.856818	30.4 ± 16.8	14.7 ± 10.4	0.232
Carbohydrate (g)	199 ± 109	273 ± 125	0.3625	284 ± 159	162 ± 110	0.232
Sugars, total (g)	72.9 ± 38.1	129 ± 72.7	0.232	107 ± 83.3	74.0 ± 66.8	0.618667
Calcium (mg)	1020 ± 563	989 ± 650	0.94	998 ± 698	1070 ± 507	0.94
Sodium (mg)	2970 ± 1210	2620 ± 1240	0.763158	4400 ± 1660	2620 ± 1560	0.232
Fiber, total dietary (g)	22.0 ± 9.53	33.6 ± 22.0	0.3625	18.8 ± 9.81	13.3 ± 11.0	0.455714
Alcohol (g)	2.02 ± 6.99	1.10 ± 3.65	0.87	0 ± 0	0 ± 0	NA
Caffeine (mg)	103 ± 103	143 ± 125	0.699412	110 ± 118	115 ± 165	0.94
Dairy (cups)	0.737 ± 0.724	0.976 ± 0.901	0.763158	1.20 ± 1.18	0.935 ± 1.01	0.787143
Fruits (cups)	1.69 ± 1.38	2.87 ± 2.54	0.423846	1.60 ± 1.74	0.288 ± 0.484	0.232
Vegetables (cups)	1.78 ± 1.38	3.53 ± 2.70	0.26825	2.01 ± 1.44	0.811 ± 0.797	0.232
Seafood (oz)	0.905 ± 1.80	1.04 ± 1.91	0.94	0.770 ± 1.28	0.723 ± 1.72	0.94
Values are mean ± SD. ASA24 is a self administered 24-hour dietary recall assessment of dietary content. p-values are from Benjamini-Hochberg adjusted Student's t tests. Seafood (oz) reflects total amount of Seafood consumed by combining two seafood groups stratified by high and low for ⍵-3 fatty acids.

## Sheet: Table S9
Table S9. DHQIII data for East Asian and White subjects stratified by BMI classification
Nutrients	Lean			Obese
	East Asian (n=12)	White (n=11)	adjusted p-value	East Asian (n=10)	White (n=13)	adjusted p-value
Energy (kcal)	2150 ± 1120	2180 ± 1600	0.97	2260 ± 1540	2910 ± 1150	0.665
Protein (g)	79.3 ± 45.7	89.4 ± 58.7	0.827273	102 ± 79.7	120 ± 53.9	0.811034
Total fat (g)	70.6 ± 35.8	85.7 ± 66.7	0.793333	86.0 ± 52.4	113 ± 45.2	0.665
Total saturated fatty acids (g)	21.8 ± 12.6	30.3 ± 27.0	0.665	28.6 ± 18.6	34.9 ± 14.3	0.665
Total monounsaturated fatty acids (g)	25.6 ± 13.1	30.5 ± 23.1	0.81	30.7 ± 18.8	42.1 ± 15.9	0.665
Total polyunsaturated fatty acids (g)	17.2 ± 9.26	17.3 ± 11.4	0.97	18.9 ± 10.4	26.0 ± 12.6	0.665
Cholesterol (mg)	253 ± 147	337 ± 261	0.665	323 ± 156	389 ± 230	0.7056
Carbohydrate (g)	296 ± 169	265 ± 199	0.851053	271 ± 184	359 ± 153	0.665
Total sugars (g)	146 ± 105	142 ± 121	0.97	125 ± 102	162 ± 87.7	0.665
Dietary fiber (g)	28.2 ± 16.5	20.9 ± 11.2	0.665	23.1 ± 19.5	34.6 ± 18.4	0.665
Calcium (mg)	1100 ± 922	1310 ± 1170	0.826875	1240 ± 1130	1450 ± 583	0.826452
Sodium (mg)	3650 ± 1730	3400 ± 1980	0.851053	4220 ± 2720	5240 ± 2190	0.665
Aspartame (mg)	14.4 ± 21.7	12.2 ± 12.9	0.851053	29.4 ± 59.7	8.30 ± 11.8	0.665
Saccharin (mg)	0.634 ± 1.55	0.449 ± 0.903	0.851053	1.29 ± 2.34	3.30 ± 7.60	0.665
Mannitol (g)	0.585 ± 0.409	0.322 ± 0.245	0.665	0.330 ± 0.302	0.667 ± 0.679	0.665
Caffeine (mg)	162 ± 122	245 ± 174	0.665	125 ± 104	171 ± 171	0.710769
Alcohol (g)	8.88 ± 15.3	3.85 ± 4.91	0.665	4.24 ± 10.3	5.62 ± 10.1	0.851053
Total dairy (cups)	1.43 ± 1.79	2.55 ± 2.95	0.665	2.22 ± 2.56	1.74 ± 0.876	0.812
Total fruit (cups)	2.36 ± 1.66	1.61 ± 1.28	0.665	1.55 ± 1.35	2.25 ± 1.47	0.665
Total vegetable (cups)	3.18 ± 2.07	2.26 ± 1.31	0.665	2.61 ± 2.50	4.02 ± 4.04	0.665
Seafood (oz)	0.948 ± 0.904	0.917 ± 0.836	0.97	1.09 ± 1.13	1.68 ± 1.40	0.665
Values are mean ± SD. DHQIII consists of 135 food and beverage line items and 26 dietary supplement questions. p-values are from Benjamini-Hochberg adjusted Student's t tests. Seafood (oz) reflects total amount of Seafood consumed by combining two seafood groups stratified by high and low for ⍵-3 fatty acids.
